# Supplementary material for: The Cancer-Associated Fibroblasts-Related Gene COMP Is a Novel Predictor for Prognosis and Immunotherapy Efficacy and Is Correlated with M2 Macrophage Infiltration in Colon Cancer
Source: Biomolecules. 2022 Dec 28;13(1):62. doi: 10.3390/biom13010062 (PMC9856124; doi:10.3390/biom13010062)
Supplement: Supplementary file 1 [file biomolecules-13-00062-s001.zip]

Archive with 8 entries (8 files):
- FIgure captions.pdf
- Figure S1.tif
- Figure S2.tif
- Figure S3.tif
- Figure S4.tif
- Figure S5.tif
- Figure S6.tif
- Figure S7.tif
